# Supplementary material for: Deciphering the Genetic Architecture of Plant Height in Soybean Using Two RIL Populations Sharing a Common M8206 Parent
Source: PubMed Central journal article supplement (PMC6843848; doi:10.3390/plants8100373), 2019-09-26
Supplement: plants-08-00373-s001.pdf [file plants-08-00373-s001.pdf]

## Supplementary materials

**Table S1** Analysis of variance (ANOVA) of plant height in MT and ZM populations over three environments.

| Population               | Source                   | DF <sup>a</sup> | MS <sup>b</sup> | F <sup>c</sup> |
|--------------------------|--------------------------|-----------------|-----------------|----------------|
| MT                       | Genotype                 | 288             | 2858.19         | 12.97**        |
|                          | Environment              | 2               | 101597.76       | 461.15**       |
|                          | Block within Environment | 6               | 6579.24         | 29.86**        |
|                          | Genotype × environment   | 573             | 360.94          | 1.64**         |
|                          | Error                    | 1651            | 220.31          |                |
|                          | ZM                       | Genotype        | 125             | 2118.32        |
| Environment              |                          | 2               | 44416.89        | 279.66**       |
| Block within Environment |                          | 6               | 2009.65         | 12.65**        |
| Genotype × environment   |                          | 250             | 346.91          | 2.18**         |
| Error                    |                          | 741             | 158.82          |                |

\*\*  $P < 0.01$

<sup>a</sup> Degrees of freedom

<sup>b</sup> Mean square

<sup>c</sup> F value is used to determine significance

**Table S2 The candidate genes related with soybean plant height in stable QTL intervals**

| <b>QTL</b>           | <b>Gene name<sup>a</sup></b>                                                                 | <b>Function annotation</b>                                                                                                         |
|----------------------|----------------------------------------------------------------------------------------------|------------------------------------------------------------------------------------------------------------------------------------|
| <i>qPH-6</i>         | <i>Glyma06g40700</i> 、 <i>Glyma06g40730</i> 、<br><i>Glyma06g40750</i> 、 <i>Glyma06g40810</i> | response to auxin stimulus                                                                                                         |
|                      | <i>Glyma06g40800</i>                                                                         | glycolysis                                                                                                                         |
|                      | <i>Glyma06g40860</i>                                                                         | auxin homeostasis, response to auxin stimulus, auxin mediated signaling pathway                                                    |
|                      | <i>Glyma06g41520</i>                                                                         | gibberellin biosynthetic process, gibberellic acid mediated signaling pathway                                                      |
|                      | <i>Glyma06g41530</i>                                                                         | cell differentiation                                                                                                               |
|                      | <i>Glyma06g41600</i>                                                                         | cytokinesis by cell plate formation                                                                                                |
|                      | <i>Glyma06g41072</i>                                                                         | auxin polar transport                                                                                                              |
|                      | <i>qPH-17</i>                                                                                | <i>Glyma17g37090</i>                                                                                                               |
| <i>Glyma17g37120</i> |                                                                                              | response to auxin stimulus, response to ethylene stimulus, positive regulation of auxin metabolic process                          |
| <i>Glyma17g37370</i> |                                                                                              | positive regulation of auxin metabolic process, regulation of meristem growth, auxin polar transport, multidimensional cell growth |
| <i>Glyma17g37650</i> |                                                                                              | tissue development                                                                                                                 |
| <i>Glyma17g37760</i> |                                                                                              | cell tip growth, response to gibberellin stimulus                                                                                  |
| <i>Glyma17g37810</i> |                                                                                              | response to ethylene stimulus                                                                                                      |
| <i>Glyma17g38000</i> |                                                                                              | regulation of unidimensional cell growth                                                                                           |
| <i>Glyma17g38150</i> |                                                                                              | gibberellic acid mediated signaling pathway                                                                                        |
| <i>Glyma17g38210</i> |                                                                                              | cell proliferation                                                                                                                 |

<sup>a</sup>The gene were annotated in Wm82.a1 reference genome.

**Table S3 Summary genetic maps in ZM and MT populations**

| Population | Chromosome   | Bin numbers | Genetic distance of bin (cM) |               |
|------------|--------------|-------------|------------------------------|---------------|
|            |              |             | Mean                         | Total         |
| ZM         | Gm01         | 117         | 1.05                         | 122.1         |
|            | Gm02         | 144         | 1.11                         | 158.7         |
|            | Gm03         | 117         | 0.82                         | 94.8          |
|            | Gm04         | 120         | 1.07                         | 127.1         |
|            | Gm05         | 109         | 0.92                         | 99.3          |
|            | Gm06         | 158         | 1.06                         | 166.6         |
|            | Gm07         | 135         | 0.93                         | 124.1         |
|            | Gm08         | 185         | 1.02                         | 187.3         |
|            | Gm09         | 131         | 0.98                         | 128           |
|            | Gm10         | 137         | 0.98                         | 133.3         |
|            | Gm11         | 123         | 1.17                         | 143.2         |
|            | Gm12         | 83          | 1.26                         | 103.3         |
|            | Gm13         | 158         | 1.14                         | 178.5         |
|            | Gm14         | 106         | 1.11                         | 116           |
|            | Gm15         | 126         | 0.98                         | 123.1         |
|            | Gm16         | 113         | 1.04                         | 116.4         |
|            | Gm17         | 119         | 1.15                         | 135.9         |
|            | Gm18         | 165         | 0.79                         | 130.4         |
|            | Gm19         | 114         | 1.18                         | 133.9         |
|            | Gm20         | 140         | 0.78                         | 108.4         |
|            | <b>Total</b> | <b>2600</b> | <b>1.01</b>                  | <b>2630.2</b> |
| MT         | Gm01         | 157         | 0.63                         | 102.4         |
|            | Gm02         | 174         | 0.84                         | 148.5         |
|            | Gm03         | 200         | 0.55                         | 109.8         |
|            | Gm04         | 171         | 0.7                          | 119.1         |
|            | Gm05         | 152         | 0.74                         | 112           |
|            | Gm06         | 223         | 0.54                         | 123           |
|            | Gm07         | 200         | 0.63                         | 125.7         |
|            | Gm08         | 224         | 0.78                         | 174.6         |
|            | Gm09         | 195         | 0.6                          | 119.1         |
|            | Gm10         | 159         | 0.87                         | 137.8         |
|            | Gm11         | 154         | 0.91                         | 145.8         |
|            | Gm12         | 134         | 0.74                         | 102.3         |
|            | Gm13         | 225         | 0.59                         | 140.9         |
|            | Gm14         | 168         | 0.65                         | 112.7         |
|            | Gm15         | 173         | 0.59                         | 101.7         |
|            | Gm16         | 167         | 0.57                         | 96.4          |
|            | Gm17         | 153         | 0.77                         | 116.5         |
|            | Gm18         | 226         | 0.49                         | 114.7         |
|            | Gm19         | 183         | 0.65                         | 140.4         |
|            | Gm20         | 160         | 0.66                         | 108.2         |
|            | <b>Total</b> | <b>3598</b> | <b>0.68</b>                  | <b>2451.7</b> |
